# Supplementary material for: Replacement of quaternary ammonium headgroups by tri-ornithine in cationic lipids for the improvement of gene delivery in vitro and in vivo
Source: Royal Society of Chemistry journal article supplement (doi:10.1039/c7tb01915g), 2017-01-01
Supplement: c7tb01915g1.pdf [file c7tb01915g1.pdf]

## Supplemental Information

### 1. The Characterization of Cationic Lipid DAO3

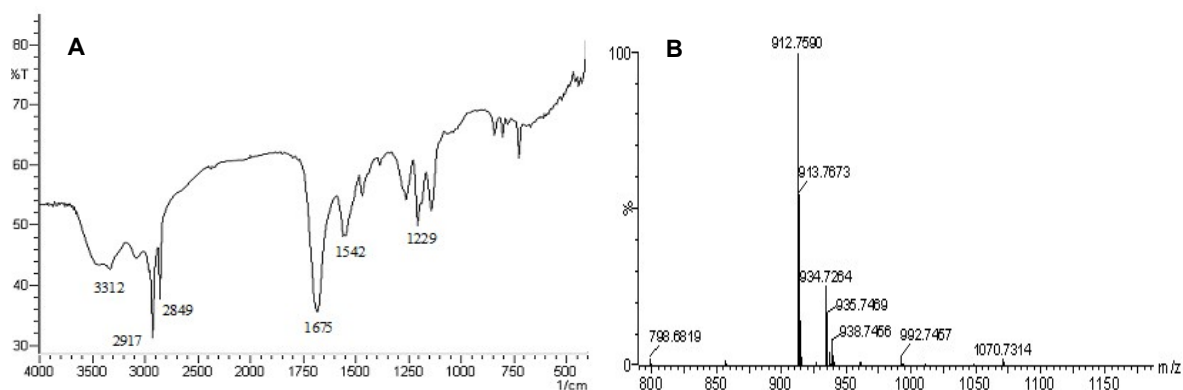

Fig. S1 Structure characterization of DAO3 (A: IR; B: HR-ESI-MS).

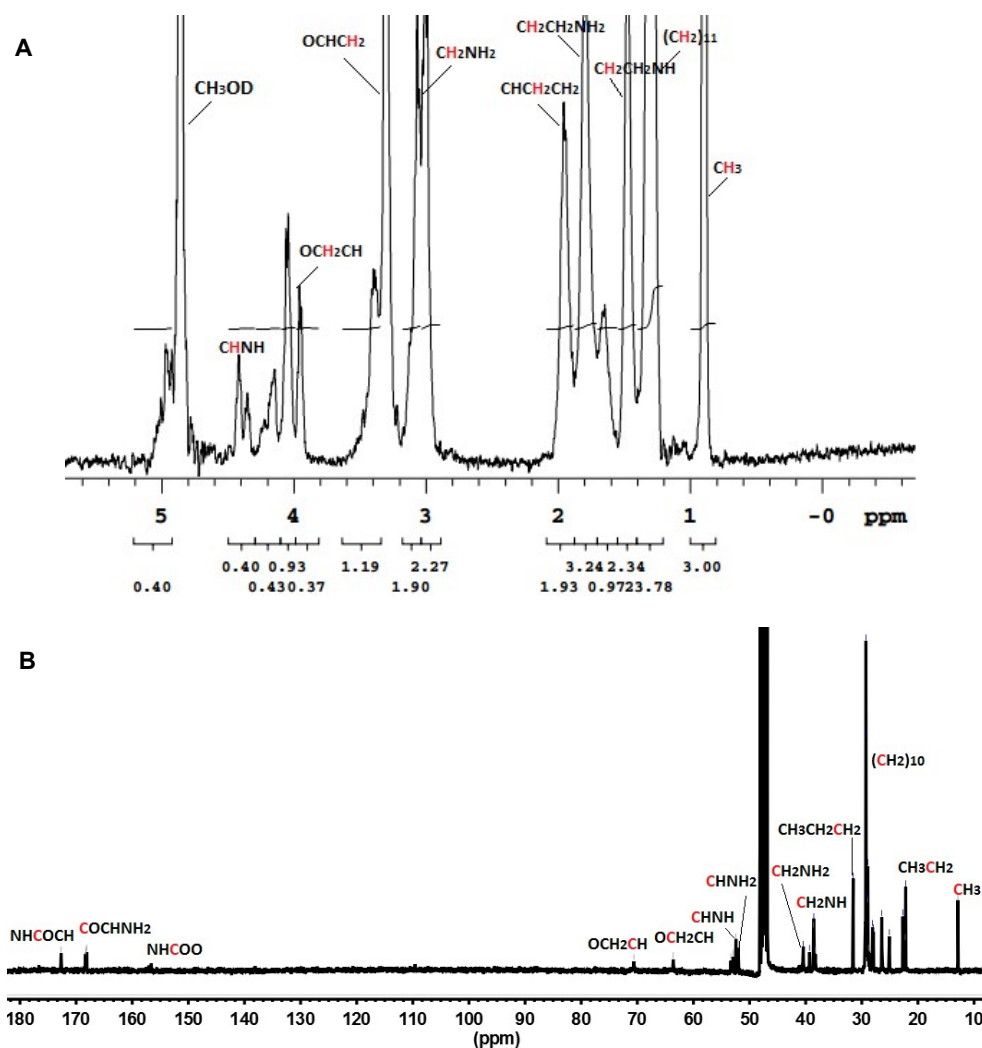

Fig. S2 Structure characterization of lipid DAO3. (A: <sup>1</sup>H NMR; B: <sup>13</sup>C NMR. The peak labelled "CH<sub>3</sub>OD" is the solvent signal.)

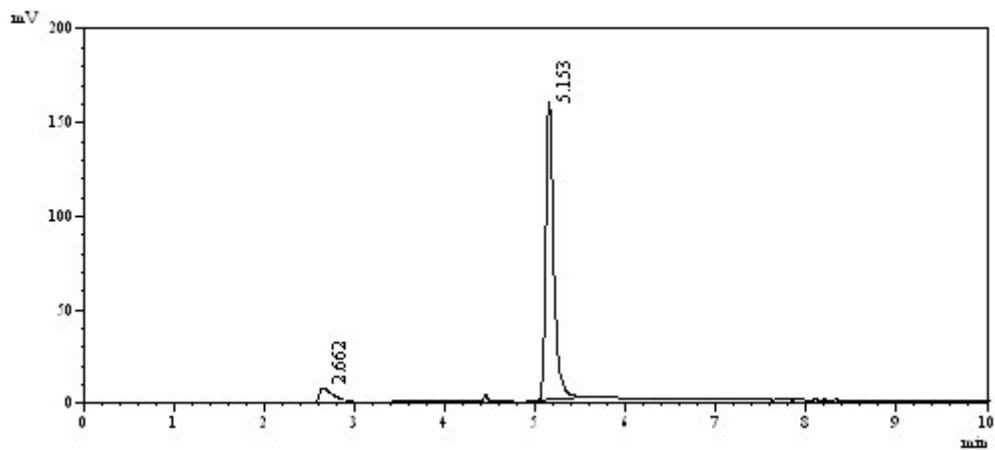

**Fig. S3** HPLC of cationic lipid of DAO3, and HPLC purity was  $97.2\% \pm 2.5$  (n=5).

## 2. TEM of Cationic Liposomes

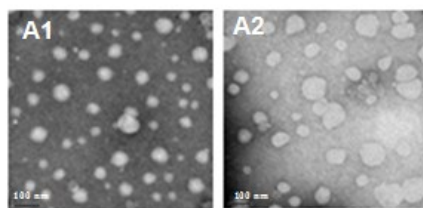

**Fig. S4** Negativ-stain transmission electron micrographs of cationic liposomes (A1: DAO3, A2: DDCTMA)

## 3. The Turbidity of Liposomes

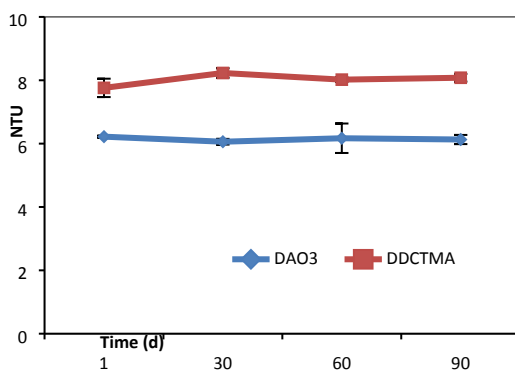

**Fig. S5** The turbid degree of liposomes DAO3 and DDCTMA.

#### 4. Fluorescence Microscopic Images of pGFP-N2 Gene Expression In Vitro

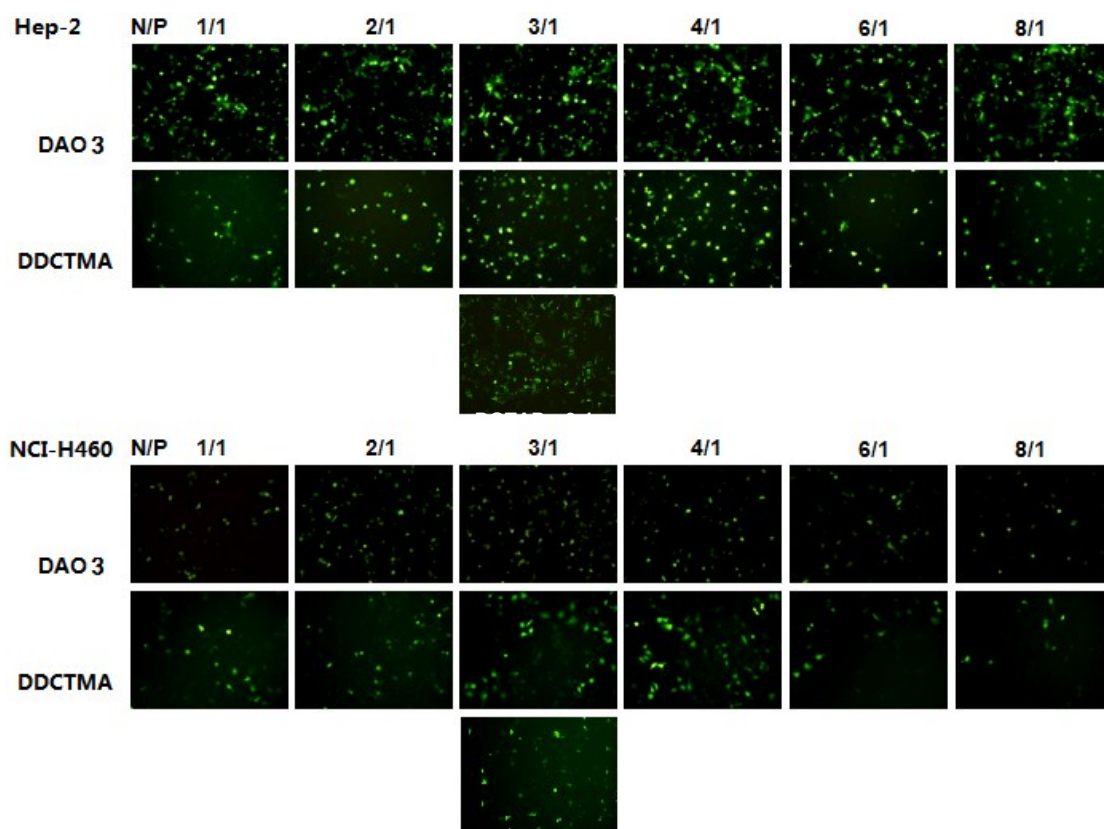

**Fig. S6** Fluorescence microscopy images of Hep-2 and NCI-H460 cells after transfection with DAO3/pGFP-N2, and DDCTMA/pGFP-N2 at different N/P ratios.

#### 5. The Weight Changes of Mice

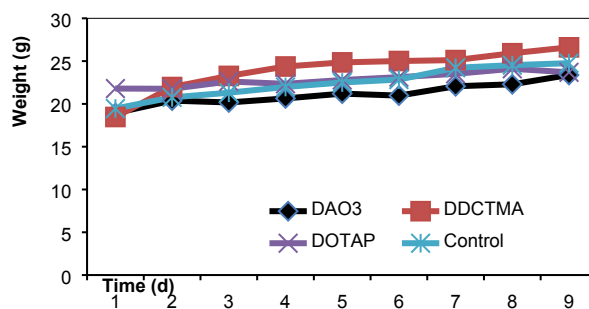

**Fig. S7** The weight changes of mice after injections of lipoplexes. (n=3)
